# Supplementary material for: Habitat loss estimation for assessing terrestrial mammalian species extinction risk: an open data framework
Source: PeerJ. 2022 Dec 12;10:e14289. doi: 10.7717/peerj.14289 (PMC9753759; doi:10.7717/peerj.14289)
Supplement: Supplemental Information 2 [file peerj-10-14289-s002.xlsx]

## Sheet: Habitat Loss Information
Supplemental File 2: Information on habitat change from all species examined.
CS = Conservation Status; CC = Conservation Category; Distribution Range; GL = Generation Length; 3*GL = Three Generation Length; TW = Time Window; FY_Hab = First Year Habitat; LY_Hab = Last Year Habitat; Cur_Hab = Current Habitat; Hab_loss = Habitat Loss;
Order	CS	CC	Dist_range (km²)	GL	3*GL	TW	FY_Hab(km²)	LY_Hab(km²)	Cur_Hab(%)	Hab_loss(km²)	Hab_loss(%)	MapBiomas Classes	Biome
Carnivora
Atelocynus microtis (Sclater, 1883)	Threatened	VU	2.77577e+06	6	18	2002-2020	2.35332e+06	2.21751e+06	79.8881	-135808	5.77094	3	AMZ
Bassaricyon alleni (O. Thomas, 1880)	Non-threatened	LC	2.19996e+06	8.195	24.585	1995-2020	1.98287e+06	1.93834e+06	88.1081	-44533.2	2.24589	3	AMZ
Cerdocyon thous (Linnaeus, 1766)	Non-threatened	LC	6.17478e+06	4.1922	12.5766	2007-2020	3.05002e+06	2.94292e+06	47.6604	-107102	3.51152	3,4,9,5,11,49	AF, AMZ, CA, CE, PAM, PAN
Chrysocyon brachyurus (Illiger, 1815)	Threatened	VU	3.26272e+06	5.568	16.704	2003-2020	890567	795838	24.3918	-94729.3	10.637	4,12	AF, CA, CE, PAM, PAN
Conepatus chinga (Molina, 1782)	Non-threatened	LC	352775	3.61	10.83	2009-2020	88625.8	69057.9	19.5756	-19567.9	22.0792	4,12	AF, PAM
Conepatus semistriatuss (Boddaert, 1785)	Non-threatened	LC	2.84491e+06	4.77	14.31	2006-2020	1.19024e+06	1.11488e+06	39.1884	-75358.9	6.33143	4,12	AF, AMZ, CA, CE,
Eira barbara (Linnaeus, 1758)	Non-threatened	LC	8.73353e+06	7.3606	22.0818	1998-2020	4.21081e+06	3.94739e+06	45.1981	-263420	6.25581	3	AF, AMZ, CA, CE, PAN
Galictis cuja (Molina, 1782)	Non-threatened	LC	4.45631e+06	3.4575	10.3725	2010-2020	1.86396e+06	1.78655e+06	40.0902	-77415.5	4.15328	3,4,11	AF, CA, CE, PAM
Galictis vittata (Schreber, 1776)	Non-threatened	LC	4.38163e+06	3.4575	10.3725	2010-2020	3.42716e+06	3.35901e+06	76.6612	-68150.8	1.98855	3,4	AMZ
Herpailurus yagouaroundi (É. Geoffroy, 1803)	Threatened	VU	8.7341e+06	6.1659	18.4977	2002-2020	5.32325e+06	5.04406e+06	57.7513	-279194	5.2448	3,4,5,49	AF, AMZ, CA, CE, PAM, PAN
Leopardus braccatus (Molina, 1782)	None of the conservation status	NE	1.94373e+06	7.104	21.312	1999-2020	757377	683049	35.1412	-74328.8	9.81397	4,12	CA, CE, PAN
Leopardus geoffroyi (d'Orbigny & Gervais, 1844)	Threatened	VU	137355	7.7476	23.2428	1997-2020	78303.5	64356.1	46.8538	-13947.4	17.812	3,4,11,12	PAM
Leopardus guttulus (Hensel, 1872)	Threatened	VU	2.05827e+06	6	18	2002-2020	526811	511145	24.8338	-15666.1	2.97375	3,4,49	AF, CE, PAM
Leopardus munoai (Ximénez, 1961)	None of the conservation status	NE	208520	7.104	21.312	1999-2020	85404.9	63057.9	30.2407	-22347	26.1659	12	PAM
Leopardus pardalis (Linnaeus, 1758)	Non-threatened	LC	8.54935e+06	8.2517	24.7551	1995-2020	5.62737e+06	5.10712e+06	59.7369	-520251	9.24502	3,4,11,49	AF, AMZ, CA, CE, PAM, PAN
Leopardus tigrinus (Schreber, 1775)	Threatened	EN	6.52692e+06	6	18	2002-2020	4.7743e+06	4.51017e+06	69.1011	-264125	5.53224	3,4	AF, AMZ, CA, CE
Leopardus wiedii (Schinz, 1821)	Threatened	VU	7.82335e+06	6	18	2002-2020	4.82637e+06	4.55862e+06	58.2693	-267758	5.54781	3,4	AF, AMZ, CA, CE, PAM
Lontra longicaudis (Olfers, 1818)	Non-threatened	NT	7.46217e+06	9.4317	28.2951	1992-2020	265544	225117	3.01678	-40427.1	15.2242	11,33	AF, AMZ, CA, CE, PAM, PAN
Lycalopex gymnocercus (G. Fischer, 1814)	Non-threatened	LC	537242	4.7064	14.1192	2006-2020	101002	78137.1	14.5441	-22864.7	22.6379	4,11,12	AF, CE, PAM
Lycalopex vetulus (Lund, 1842)	Threatened	VU	2.17598e+06	4.035	12.105	2008-2020	815814	763034	35.0662	-52780.4	6.46965	4,12	CA, CE
Mustela africana (Desmarest, 1818)	None of the conservation status	DD	3.72622e+06	4.3087	12.9261	2007-2020	3.07619e+06	3.00709e+06	80.7007	-69101.8	2.24634	3	AMZ
Nasua nasua (Linnaeus, 1766)	Non-threatened	LC	8.73168e+06	7.6122	22.8366	1997-2020	5.49091e+06	5.05576e+06	57.9013	-435154	7.92499	3,4,49	AF, AMZ, CA, CE, PAM, PAN
Panthera onca (Linnaeus, 1758)	Threatened	VU	7.18476e+06	9.8128	29.4384	1991-2020	5.05984e+06	4.46087e+06	62.088	-598962	11.8376	3,4,11	AF, AMZ, CA, CE, PAN
Potos flavus (Schreber, 1774)	Non-threatened	LC	5.07841e+06	11.3981	34.1943	1986-2020	3.93749e+06	3.47199e+06	68.3675	-465508	11.8224	3	AF, AMZ
Procyon cancrivorus (Cuvier, 1798)	Non-threatened	LC	8.73593e+06	6.0054	18.0162	2002-2020	4.22573e+06	4.02422e+06	46.0651	-201509	4.76863	3,5,11	AF, AMZ, CA, CE, PAM, PAN
Puma concolor (Linnaeus, 1771)	Threatened	VU	8.64851e+06	7.3802	22.1406	1998-2020	5.99569e+06	5.54987e+06	64.1714	-445826	7.43577	3,4,11,12	AF, AMZ, CA, CE, PAM, PAN
Pteronura brasiliensis (Gmelin, 1788)	Threatened	VU	4.63201e+06	8.21	24.63	1995-2020	3.57781e+06	3.27531e+06	70.7103	-302502	8.45496	3,33	AMZ, CE, PAN
Speothos venaticus (Lund, 1842)	Threatened	VU	7.36471e+06	4.27156	12.8147	2007-2020	4.96756e+06	4843460	65.7658	-124100	2.4982	3,4,12	AF, AMZ, CE, PAN
Cetartiodacyla
Blastocerus dichotomus (Illiger, 1815)	Threatened	VU	468072	5	15	2005-2020	53039.4	40361.9	8.62302	-12677.5	23.902	11	AF, AMZ, CE, PAM, PAN
Mazama americana Erxleben, 1777	None of the conservation status	DD	5.73435e+06	5.527	16.581	2003-2020	3.65714e+06	3.50281e+06	61.0847	-154334	4.22007	3	AF, AMZ, CE, PAN
Mazama bororo (Duarte, 1996)	Threatened	VU	38190.3	5.877	17.631	2002-2020	21702	21530	56.3755	-171.988	0.792502	3	AF
Mazama gouazoubira G. Fischer [von Waldheim], 1814	Non-threatened	LC	4.13529e+06	5.9125	17.7375	2002-2020	1.93408e+06	1.84439e+06	44.6012	-89689.5	4.63732	3,4,12	AF, CA, CE, PAM, PAN
Mazama nana (Hensel, 1872)	Threatened	VU	398705	6.2845	18.8535	2001-2020	126714	125702	31.5275	-1012.83	0.799301	3,4	AF
Mazama nemorivaga Cuvier, 1817	None of the conservation status	DD	4.58132e+06	5.9763	17.9289	2002-2020	3.65928e+06	3.46186e+06	75.5646	-197421	5.39508	3,4	AF, AMZ
Odocoileus virginianus Zimmermann, 1780	None of the conservation status	DD	209636	7.4353	22.3059	1998-2020	43809	43634	20.8142	-175.036	0.399544	4,5,12	AMZ
Ozotoceros bezoarticus bezoarticus (Linnaeus, 1758)	Threatened	VU	292720	7.7991	23.3973	1997-2020	129455	105803	36.1449	-23651.4	18.27	4,12	AMZ, CE, PAM, PAN
Ozotocerus bezoarticus leucogaster (Goldfüss, 1817))	Threatened	VU	883431	7.7991	23.3973	1997-2020	270730	259566	29.3816	-11164.1	4.12371	4,12	AF, AMZ, CE, PAM, PAN
Pecari tajacu Linnaeus, 1758	Non-threatened	LC	8.16041e+06	8.5012	25.5036	1994-2020	5.73384e+06	5.20846e+06	63.826	-525371	9.16264	3,4,12,13	AF, AMZ, CA, CE, PAN
Tayassu pecari (Link, 1795)	Threatened	VU	6.37954e+06	8.7052	26.1156	1994-2020	4.85809e+06	4.40513e+06	69.0508	-452963	9.32389	3,4,11,12	AF, AMZ, CA, CE, PAN
Cingulata
Cabassous tatouay Desmarest, 1804	None of the conservation status	DD	2507059	5.09348	15.2804	2005 - 2020	1.03066e+06	984785	39.2805	-45871.8	4.45073	3, 4, 12, 49	AF, CA, CE, PAM
Cabassou unicinctus (Linnaeus, 1758)	Non-threatened	LC	6881140	5.09348	15.2804	2005 - 2020	4.81727e+06	4.64674e+06	67.5286	-170532	3.54002	3, 4, 12, 49	AF, AMZ, CA, CE, PAN
Dasypus beniensis (Lönnberg, 1942)	None of the conservation status	NE	2283098	4.76416	14.2925	2006 - 2020	1.4292e+06	1.35786e+06	59.4744	-71345.7	4.99199	3	AMZ, CE, PAN
Dasypus kappleri (Krauss, 1862)	Non-threatened	LC	605677	4.76416	14.2925	2006 - 2020	523581	520377	85.9166	-3204.21	0.611979	3	AMZ
Dasypus novemcinctus (Linnaeus, 1758)	Non-threatened	LC	8514790	4.35534	13.066	2007 - 2020	5.8103e+06	5.62884e+06	66.1067	-181458	3.12304	3, 4, 5, 11, 12, 49	AF, AMZ, CA, CE, PAM, PAN
Dasypus pastasae (Thomas, 1901)	None of the conservation status	NE	1448400	4.76416	14.2925	2006 - 2020	1.35374e+06	1.33917e+06	92.4583	-14577	1.07679	3	AMZ
Dasypus septemcinctus (Linnaeus, 1758)	Non-threatened	LC	4736410	5.17299	15.519	2004 - 2020	2.57577e+06	2.42225e+06	51.141	-153520	5.96017	3, 4, 5, 11, 12, 49	AF, AMZ, CA, CE, PAM, PAN
Euphractus sexcinctus (Linnaeus, 1758)	Non-threatened	LC	5901456	5.33086	15.9926	2004 - 2020	3.45759e+06	3.25664e+06	55.1836	-200956	5.81201	3, 4, 5, 11, 12, 49	AF, AMZ, CA, CE, PAM, PAN
Priodontes maximus (Kerr, 1792)	Threatened	VU	6183830	11.48	33	1987 - 2020	4.48028e+06	3.84772e+06	62.2222	-632567	14.1189	3, 4	AF, AMZ, CA, CE, PAN
Tolypeutes matacus Desmarest, 1804	Non-threatened	NT	15785.6	3.9	11.7	2008 - 2020	9002.42	6142.11	38.9095	-2860.3	31.7726	3, 4, 11	CE, PAN
Tolypeutes tricinctus (Linnaeus, 1758)	Threatened	EN	950977	5.64	16.92	2003 - 2020	578591	547161	57.5368	-31430	5.43216	4	CA, CE
Perissodactyla
Tapirus terrestris (Linnaeus, 1758)	Threatened	VU	7.5299e+06	11	33	1987-2020	5.28989e+06	4.5782e+06	60.8003	-711682	13.4536	3,4,11	AF, AMZ, CA, CE, PAN
Pilosa
Bradypus torquatus (Illiger, 1811)	Threatened	VU	107943	10.7589	32.2767	1988 - 2020	37519.4	35442.6	32.8346	-2076.78	5.53523	3	AF
Bradypus tridactylus Linnaeus, 1758	Non-threatened	LC	672887	10.7589	32.2767	1988 - 2020	560240	546732	81.2516	-13508.1	2.41113	3	AMZ
Bradypus variegatus (Amazon) Schinz, 1825	Non-threatened	LC	4852531	10.7589	32.2767	1988 - 2020	3.39123e+06	2.95122e+06	60.8181	-440011	12.975	3	AMZ, CA
Bradypus variegatus (AF) Schinz, 1825	Non-threatened	LC	715983	10.7589	32.2767	1988 - 2020	177296	174293	24.3432	-3003.42	1.69401	3	AF, CE
Choloepus didactylus Illiger, 1811	Non-threatened	LC	3773370	12.57	37.71	1982 - 2020	3.36571e+06	3.0496e+06	80.8189	-316108	9.39203	3	AMZ, CE
Choloepus hoffmanni Peters, 1858	None of the conservation status	DD	540950	12.9034	38.7103	1981 - 2020	499341	373982	69.1343	-125359	25.1049	3	AMZ
Cyclopes didactylus (Amazon) (Linnaeus, 1758)	Non-threatened	LC	1.35979e+06	6.93	20.79	1999 - 2020	1.01959e+06	978249	71.9413	-41336.5	4.05425	3, 49	AMZ, CA
Cyclopes didactylus (AF) (Linnaeus, 1758)	Non-threatened	LC	68587.8	6.93	20.79	1999 - 2020	6298.28	7552.83	11.0119	1254.56	-19.919	3, 49	AF, CA
Cyclopes ida Miranda, Casali, Perini, Machado & Santos, 2017	None of the conservation status	NE	948344	6.93	20.79	1999 - 2020	872056	868149	91.5437	-3907.64	0.448095	3	AMZ
Cyclopes rufus Miranda, Casali, Perini, Machado & Santos, 2017	None of the conservation status	NE	68484.4	6.93	20.79	1999 - 2020	42719.6	28165.2	41.1264	-14554.4	34.0697	3	AMZ
Cyclopes thomasis Miranda, Casali, Perini, Machado & Santos, 2017	None of the conservation status	NE	181848	6.93	20.79	1999 - 2020	176384	171606	94.3676	-4778.69	2.70925	3	AMZ
Cylopes xinguensis Miranda, Casali, Perini, Machado & Santos, 2017	None of the conservation status	NE	302221	6.93	20.79	1999 - 2020	250414	223010	73.7902	-27404.3	10.9436	3	AMZ
Myrmecophaga tridactyla (Linnaeus, 1758)	Threatened	VU	7095220	7.0137	21.0411	1999 - 2020	4.46284e+06	4.12429e+06	58.1278	-338546	7.58589	3, 4	AMZ, CA, CE, AF, PAN
Tamandua tetradactyla (Linnaeus, 1758)	Non-threatened	LC	8514790	6.93	20.79	1999 - 2020	5.54893e+06	5.16278e+06	60.6331	-386150	6.95899	3, 4, 5, 11, 49	AF, AMZ, CA, CE, PAM, PAN
Primates
Alouatta belzebul (Linnaeus, 1766)	Threatened	VU	826910	11.6667	35	1985-2020	628576	452649	54.7398	-175926	27.9881	3,4,5,49	AF, AMZ, CE
Alouatta caraya (Humboldt,1812)	Non-threatened	NT	2.71342e+06	11.6667	35	1985-2020	1.51234e+06	1.16725e+06	43.0176	-345088	22.8182	3,4,5,49	AF, AMZ, CA, CE, PAM, PAN
Alouatta discolor (Spix, 1823)	Threatened	VU	437168	11.6667	35	1985-2020	411116	364813	83.4491	-46303.1	11.2628	3,4,5,49	AMZ
Alouatta guariba clamitans (Cabrera, 1940)	Threatened	VU	793826	11.6667	35	1985-2020	231183	226010	28.471	-5173.02	2.23763	3,4,5,49	AF, CE, PAM
Alouatta guariba guariba (Humboldt, 1812)	Threatened	CR	169982	11.6667	35	1985-2020	53192.6	51552.9	30.3285	-1639.68	3.08253	3,4,5,49	AF
Alouatta macconnelli Elliot, 1910	Non-threatened	LC	877998	11.6667	35	1985-2020	746300	730685	83.2217	-15615.4	2.09237	3,4,5,49	AMZ
Alouatta nigerrima Lönnberg, 1941	Non-threatened	LC	213514	11.6667	35	1985-2020	189357	182546	85.496	-6810.75	3.59678	3,4,5,49	AMZ
Alouatta seniculus (Linnaeus, 1766)	None of the conservation status	NE	1516460	11.6667	35	1985-2020	1.44677e+06	1.32129e+06	87.13	-125481	8.67318	3,4,5,49	AMZ, CE
Alouatta ululata (Elliot, 1912)	Threatened	VU	152520	11.6667	35	1985-2020	126455	121179	79.4515	-5275.4	4.17177	3,4,5,49	CA, CE
Aotus azarae azarae (Humboldt, 1811)	None of the conservation status	DD	2961.48	8	24	1996-2020	1508.84	1373.13	46.3665	-135.705	8.99399	3,4,5,49	PAN
Aotus azarae infulatus (Kühl, 1820)	Non-threatened	LC	1899606	8	24	1996-2020	1.47149e+06	1.11188e+06	58.5322	-359614	24.4387	3,4,5,49	AMZ, CA, CE, PAN
Aotus nancymaae (Hershkovitz, 1983)	Non-threatened	LC	134358	8	24	1996-2020	131893	131533	97.8975	-360.146	0.273058	3,4,5,49	AMZ
Aotus nigriceps Dollman, 1909	Non-threatened	LC	1299760	8	24	1996-2020	1.17962e+06	1.09562e+06	84.2939	-83996.5	7.12067	3,4,5,49	AMZ, CE
Aotus trivirgatus (Humboldt, 1812)	Non-threatened	LC	494501	8	24	1996-2020	433549	426019	86.1513	-7529.42	1.73669	3,4,5,49	AMZ
Aotus vociferans (Spix, 1823)	Non-threatened	LC	142119	8	24	1996-2020	135033	134352	94.5351	-680.517	0.503964	3,4,5,49	AMZ
Ateles belzebuth (É. Geoffroy, 1806)	Threatened	VU	268817	11.6667	35	1985-2020	246818	243330	90.5187	-3487.85	1.41313	3,4,5,49	AMZ
Ateles chamek (Humboldt, 1812)	Threatened	VU	1796480	11.6667	35	1985-2020	1.65016e+06	1.47098e+06	81.8813	-179176	10.8581	3,4,5,49	AMZ, CE, PAN
Ateles marginatus (É. Geoffroy, 1809)	Threatened	EN	489534	11.6667	35	1985-2020	459158	398585	81.4213	-60572.9	13.1922	3,4,5,49	AMZ
Ateles paniscus (Linnaeus, 1758)	Non-threatened	LC	617425	11.6667	35	1985-2020	544113	532505	86.2461	-11608.1	2.1334	3,4,5,49	AMZ
Brachyteles arachnoides (É. Geoffroy, 1806)	Threatened	EN	121749	11.6667	35	1985-2020	51010.3	50465	41.45	-545.261	1.06892	3,4,5,49	AF
Brachyteles hypoxanthus (Khul, 1820)	Threatened	CR	257248	11.6667	35	1985-2020	77682.4	78549.3	30.5345	866.9	-1.11595	3,4,5,49	AF
Cacajao ayresi (Boubli, da Silva, Amado, Herbk, Pontual & Farias, 2008)	None of the conservation status	DD	1715.1	10	30	1990-2020	1472.37	1463.49	85.3299	-8.87541	0.602798	3,4,5,49	AMZ
Cacajao calvus calvus (I. Geoffroy, 1847)	Non-threatened	LC	54843.4	10	30	1990-2020	51439.1	50373.1	91.849	-1066	2.07235	3,4,5,49	AMZ
Cacajao calvus novaesi (Hershkovitz, 1987)	None of the conservation status	DD	9794.3	10	30	1990-2020	9658.53	9603.62	98.0532	-54.9084	0.568497	3,4,5,49	AMZ
Cacajao calvus rubicundus (I. Geoffroy & Deville, 1848)	Non-threatened	LC	24007.1	10	30	1990-2020	7947.12	7763	32.3363	-184.117	2.31678	3,4,5,49	AMZ
Cacajao calvus ucayalii (Thomas, 1928)	None of the conservation status	DD	14991.7	10	30	1990-2020	14531.5	13869.9	92.517	-661.644	4.55316	3,4,5,49	AMZ
Cacajao melanocephalus (Humboldt, 1811)	Non-threatened	EN	33618.9	10	30	1990-2020	32351.3	32297	96.068	-54.3026	0.167853	3,4,5,49	AMZ
Cacajao ouakary (Spix, 1823)	Non-threatened	LC	294756	10	30	1990-2020	279285	278287	94.4125	-998.001	0.357342	3,4,5,49	AMZ
Callibella humilis (M. van Roosmalen, T. van Roosmalen, Mittermeier & de Fonseca, 1998)	Non-threatened	LC	67374.3	5	15	2005-2020	61386	59774.7	88.7203	-1611.27	2.62482	3,4,5,49	AMZ
Callicebus barbarabrownae (Hershkovitz, 1990)	Threatened	CR	167470	8	24	1996-2020	80946.5	78106.6	46.6391	-2839.89	3.50836	3,4,5,49	CA
Callicebus coimbrai (Kobayashi & Langguth, 1999)	Threatened	EN	22473.2	8	24	1996-2020	5537.33	5409.16	24.0694	-128.166	2.31459	3,4,5,49	AF
Callicebus melanochir (Wied-Neuwied, 1820)	Threatened	VU	104137	8	24	1996-2020	32259	32636.3	31.3398	377.299	-1.16959	3,4,5,49	AF
Callicebus nigrifrons (Spix, 1823)	Non-threatened	LC	517138	8	24	1996-2020	119171	117958	22.8098	-1213.14	1.01798	3,4,5,49	AF, CE
Callicebus personatus (É. Geoffroy, 1812)	Threatened	VU	103139	8	24	1996-2020	37801	37317.2	36.1815	-483.752	1.27973	3,4,5,49	AF, CE
Callimico goeldii (Thomas, 1904)	Non-threatened	LC	226675	6	18	2002-2020	211915	198096	87.3922	-13818.8	6.5209	3,4,5,49	AMZ
Callithrix aurita (É. Geoffroy in Humboldt, 1812)	Threatened	EN	164030	6	18	2002-2020	44981.9	47848	29.1703	2866.11	-6.37169	3,4,5,49	AF, CE
Callithrix flaviceps (Thomas, 1903)	Threatened	EN	28425	6	18	2002-2020	8305.37	8985.62	31.6117	680.25	-8.19048	3,4,5,49	AF
Callithrix geoffroyi (É. Geoffroy in Humboldt, 1812)	Non-threatened	LC	158440	6	18	2002-2020	54212.9	54569.1	34.4415	356.188	-0.657017	3,4,5,49	AF, CE
Callithrix jacchus (Linnaeus, 1758)	Non-threatened	LC	664403	6	18	2002-2020	444879	432326	65.0699	-12552.3	2.82151	3,4,5,49	AF, CA, CE
Callithrix kuhlii Coimbra-Filho, 1985	Non-threatened	NT	35026	6	18	2002-2020	13771.8	14417.7	41.1628	645.901	-4.69003	3,4,5,49	AF
Callithrix penicillata (É. Geoffroy, 1812)	Non-threatened	LC	1156880	6	18	2002-2020	467168	437725	37.8367	-29443.2	6.30248	3,4,5,49	AF, CA, CE
Cebuella niveiventris (Spix, 1823)	Non-threatened	LC	892075	5	15	2005-2020	854237	838371	93.9799	-15866.1	1.85735	3,4,5,49	AMZ
Cebuella pygmaea (Spix, 1823)	Non-threatened	LC	70463	5	15	2005-2020	65253.8	65237	92.5833	-16.8004	0.0257462	3,4,5,49	AMZ
Cebus albifrons (Humboldt, 1812)	Non-threatened	LC	71391.7	11.6667	35	1985-2020	67267.3	67184	94.1061	-83.2853	0.123812	3,4,5,49	AMZ
Cebus kaapori (Queiroz, 1992)	Threatened	CR	206081	11.6667	35	1985-2020	156312	104979	50.9406	-51333.2	32.8402	3,4,5,49	AMZ
Cebus olivaceus Schomburgk 1848	Non-threatened	LC	771410	11.6667	35	1985-2020	672076	656530	85.1078	-15546.1	2.31314	3,4,5,49	AMZ
Cebus unicolor (Spix, 1823)	Non-threatened	LC	1467100	11.6667	35	1985-2020	1.38318e+06	1.33246e+06	90.8226	-50724.1	3.6672	3,4,5,49	AMZ, CE
Cebus yuracus (Hershkovitz, 1949)	None of the conservation status	DD	366425	11.6667	35	1985-2020	357382	337674	92.1535	-19708.6	5.51471	3,4,5,49	AMZ
Cheracebus lucifer Thomas, 1914	Non-threatened	LC	70366.7	8	24	1996-2020	65236.3	64597.2	91.8008	-639.126	0.97971	3,4,5,49	AMZ
Cheracebus lugens (Humboldt, 1811)	Non-threatened	LC	315974	8	24	1996-2020	259763	256390	81.1428	-3373.01	1.2985	3,4,5,49	AMZ
Cheracebus purinus Thomas, 1927	Non-threatened	LC	240608	8	24	1996-2020	232311	231775	96.3289	-535.942	0.2307	3,4,5,49	AMZ
Cheracebus regulus Thomas, 1927	Non-threatened	LC	219363	8	24	1996-2020	213422	212988	97.094	-433.665	0.203196	3,4,5,49	AMZ
Chiropotes albinasus (I. Geoffroy & Deville, 1848)	Non-threatened	NT	1135880	10	30	1990-2020	1.03945e+06	895805	78.8644	-143649	13.8197	3,4,5,49	AMZ, CE
Chiropotes chiropotes (Humboldt, 1811)	Non-threatened	LC	253730	10	30	1990-2020	200869	196980	77.6335	-3889.76	1.93646	3,4,5,49	AMZ
Chiropotes sagulatus (Humboldt, 1811)	Non-threatened	LC	624657	10	30	1990-2020	544826	534224	85.5227	-10602.5	1.94604	3,4,5,49	AMZ
Chiropotes satanas (Hoffmannsegg, 1807)	Threatened	CR	281290	10	30	1990-2020	202031	147651	52.4908	-54379.6	26.9165	3,4,5,49	AMZ, CE
Chiropotes utahickae (Hershkovitz, 1985)	Threatened	VU	351396	10	30	1990-2020	296001	209368	59.5817	-86633	29.2678	3,4,5,49	AMZ, CE
Lagothrix lagothricha cana (É. Geoffroy in Humboldt, 1812)	Threatened	EN	1262060	11.6667	35	1985-2020	1.17453e+06	1.0504e+06	83.2293	-124124	10.568	3,4,5,49	AMZ, CE
Lagothrix lagothricha lagothricha (Humboldt, 1812)	Threatened	VU	57681.1	11.6667	35	1985-2020	54640.7	54275.8	94.0964	-364.892	0.667803	3,4,5,49	AMZ
Lagothrix lagothricha poeppigii (Schinz, 1844)	Threatened	VU	242205	11.6667	35	1985-2020	236465	234865	96.9694	-1600.41	0.676807	3,4,5,49	AMZ
Leontocebus cruzlimai (Hershkovitz, 1966)	None of the conservation status	DD	27680.4	6	18	2002-2020	27503.9	27385.2	98.9336	-118.715	0.431628	3,4,5,49	AMZ
Leontocebus fuscicollis (Spix, 1823)	Non-threatened	LC	401079	6	18	2002-2020	387971	386558	96.3796	-1412.93	0.364185	3,4,5,49	AMZ
Leontocebus fuscus (Lesson, 1840)	Non-threatened	LC	46595.5	6	18	2002-2020	45469.6	45265.6	97.1458	-203.992	0.448634	3,4,5,49	AMZ
Leontocebus nigricollis (Spix, 1823)	None of the conservation status	DD	14966.9	6	18	2002-2020	13796.8	13571.2	90.675	-225.56	1.63487	3,4,5,49	AMZ
Leontocebus weddelli (Miranda Ribeiro, 1912)	Non-threatened	LC	502302	6	18	2002-2020	409654	372637	74.1859	-37016.5	9.03604	3,4,5,49	AMZ
Leontopithecus caissara (Lorini & Persson, 1990)	Threatened	EN	358.168	7	21	1999-2020	302.803	304.53	85.0244	1.72713	-0.570381	3,4,5,49	AF
Leontopithecus chrysomelas (Kuhl, 1820)	Threatened	EN	24033.7	7	21	1999-2020	9212.82	9540.64	39.6969	327.827	-3.55838	3,4,5,49	AF
Leontopithecus chrysopygus (Mikan, 1823)	Threatened	EN	48467.2	7	21	1999-2020	5405.72	5773.67	11.9125	367.945	-6.80658	3,4,5,49	AF
Leontopithecus rosalia (Linnaeus, 1766)	Threatened	EN	6348.31	7	21	1999-2020	1994.79	2126.06	33.4901	131.265	-6.58041	3,4,5,49	AF
Mico acariensis (M. van Roosmalen, T. van Roosmalen, Mittermeier & Rylands, 2000)	Non-threatened	LC	15660.7	6	18	2002-2020	15412.5	14472.3	92.4113	-940.227	6.10042	3,4,5,49	AMZ
Mico argentatus (Linnaeus, 1766)	Non-threatened	LC	138888	6	18	2002-2020	112220	103643	74.6238	-8576.68	7.64273	3,4,5,49	AMZ
Mico chrysoleucus (Wagner, 1842)	Non-threatened	LC	42791.7	6	18	2002-2020	37909.6	36311.4	84.8562	-1598.17	4.21574	3,4,5,49	AMZ
Mico emiliae (Thomas, 1920)	Non-threatened	LC	169792	6	18	2002-2020	141724	133196	78.4464	-8527.85	6.01724	3,4,5,49	AMZ
Mico humeralifer (É. Geoffroy Saint Hilaire, 1812)	Non-threatened	LC	83557.5	6	18	2002-2020	68955.3	68415.2	81.878	-540.062	0.783206	3,4,5,49	AMZ
Mico intermedius (Hershkovitz, 1977)	Non-threatened	LC	64305.3	6	18	2002-2020	45013.4	42294.2	65.7709	-2719.27	6.04101	3,4,5,49	AMZ
Mico leucippe (Thomas, 1922)	Non-threatened	LC	70830.9	6	18	2002-2020	65165.3	56817.9	80.2162	-8347.4	12.8096	3,4,5,49	AMZ
Mico marcai (Alperin, 1993)	None of the conservation status	DD	40430.4	6	18	2002-2020	38744.7	37049.1	91.6368	-1695.55	4.37621	3,4,5,49	AMZ
Mico mauesi (Mittermeier, Schwarz & Ayres, 1992)	Non-threatened	LC	61135.8	6	18	2002-2020	56891.9	56469	92.3666	-422.901	0.743341	3,4,5,49	AMZ
Mico melanurus (É. Geoffroy em Humboldt, 1812)	Non-threatened	NT	356434	6	18	2002-2020	211939	193776	54.3653	-18162.6	8.56972	3,4,5,49	AMZ, CE, PAN
Mico munduruku Costa-Araújo, Farias & Hrbek, 2019	None of the conservation status	NE	60563.9	6	18	2002-2020	58201.5	57104.4	94.2879	-1097.1	1.88501	3,4,5,49	AMZ
Mico nigriceps (Ferrari & Lopes, 1992)	Non-threatened	LC	65329.6	6	18	2002-2020	54514	52794	80.8118	-1719.95	3.15506	3,4,5,49	AMZ
Mico rondoni (Ferrari, Sena, Schneider & Silva Jr., 2010)	Threatened	VU	114252	6	18	2002-2020	80355.3	62401.3	54.6173	-17953.9	22.3432	3,4,5,49	AMZ
Mico saterei (silva junior & noronha, 1998)	Non-threatened	LC	19569.7	6	18	2002-2020	19015.8	19005.1	97.1147	-10.7846	0.0567139	3,4,5,49	AMZ
Pithecia albicans (Gray, 1860)	Non-threatened	LC	122363	9	27	1993-2020	110902	110579	90.3695	-323.558	0.29175	3,4,5,49	AMZ
Pithecia chrysocephala (Linnaeus, 1766)	Non-threatened	LC	184549	9	27	1993-2020	191929	189273	102.56	-2655.87	1.38378	3,4,5,49	AMZ
Pithecia irrorata (Gray, 1842)	None of the conservation status	DD	1069980	9	27	1993-2020	1.28126e+06	1.17504e+06	109.819	-106222	8.29045	3,4,5,49	AMZ, CE
Pithecia monachus (É. Geoffroy, 1812)	Non-threatened	LC	311776	9	27	1993-2020	300953	298869	95.8601	-2084.55	0.692649	3,4,5,49	AMZ
Pithecia pithecia (Linnaeus, 1766)	Non-threatened	LC	447020	9	27	1993-2020	358242	355655	79.5614	-2586.75	0.722067	3,4,5,49	AMZ
Pithecia vanzolinii (Hershkovitz, 1987)	Non-threatened	LC	77544.8	9	27	1993-2020	81517.3	79472	102.485	-2045.3	2.50904	3,4,5,49	AMZ
Plecturocebus baptista Lönnberg, 1939	None of the conservation status	DD	28354.9	8	24	1996-2020	24063.6	23716.3	83.6408	-347.315	1.44332	3,4,5,49	AMZ
Plecturocebus bernhardi (M. van Roosmalen, T. van Roosmalen & Mittermeier, 2002)	Non-threatened	LC	194056	8	24	1996-2020	145003	128659	66.2997	-16344.8	11.272	3,4,5,49	AMZ
Plecturocebus brunneus (Wagner, 1842)	Non-threatened	NT	145486	8	24	1996-2020	118503	85978.3	59.0973	-32525.2	27.4466	3,4,5,49	AMZ
Plecturocebus caligatus (Wagner, 1842)	Non-threatened	LC	171562	8	24	1996-2020	156105	150694	87.8364	-5411.28	3.46643	3,4,5,49	AMZ
Plecturocebus cinerascens (Spix, 1823)	Non-threatened	LC	295788	8	24	1996-2020	257837	235518	79.6239	-22319	8.65626	3,4,5,49	AMZ, CE
Plecturocebus cupreus (Spix, 1823)	Non-threatened	LC	637955	8	24	1996-2020	619774	613867	96.2241	-5907.49	0.953168	3,4,5,49	AMZ
Plecturocebus grovesi Boubli et al., 2019	None of the conservation status	NE	66084.1	8	24	1996-2020	54862.1	42446.1	64.2304	-12416	22.6312	3,4,5,49	AMZ
Plecturocebus hoffmannsi (Thomas, 1908)	Non-threatened	LC	125763	8	24	1996-2020	113365	112249	89.2543	-1115.95	0.984384	3,4,5,49	AMZ
Plecturocebus miltoni (Dalponte, Silva & Silva Júnior, 2014)	None of the conservation status	NE	34036.8	8	24	1996-2020	33461.1	30672.6	90.1161	-2788.47	8.33347	3,4,5,49	AMZ
Plecturocebus moloch (Hoffmannsegg, 1807)	Non-threatened	LC	950834	8	24	1996-2020	746964	631122	66.3756	-115842	15.5084	3,4,5,49	AMZ, CE
Plecturocebus pallescens (Thomas, 1907)	None of the conservation status	NA	3054.5	8	24	1996-2020	1455.1	1411.27	46.2031	-43.8236	3.01173	3,4,5,49	PAN
Plecturocebus parecis Gusmão et al., 2019	None of the conservation status	NE	58033.4	8	24	1996-2020	52227.7	42593.6	73.395	-9634.07	18.4463	3,4,5,49	AMZ, CE
Plecturocebus stephennashi M. van Roosmalen, T. van Roosmalen & Mittermeier, 2002	None of the conservation status	DD	31734.1	8	24	1996-2020	30077.6	29646.2	93.4206	-431.462	1.43449	3,4,5,49	AMZ
Plecturocebus toppini (Thomas, 1914)	None of the conservation status	NE	84350.7	8	24	1996-2020	73933.4	62734.9	74.3738	-11198.6	15.1468	3,4,5,49	AMZ
Plecturocebus vierai Gualda-Barros, do Nascimento, do Amaral, 2012	None of the conservation status	DD	219680	8	24	1996-2020	200256	177351	80.7315	-22904.8	11.4378	3,4,5,49	AMZ
Saguinus bicolor (Spix, 1823)	Threatened	CR	8614.22	6	18	2002-2020	7213.12	7113.42	82.5776	-99.699	1.38219	3,4,5,49	AMZ
Saguinus imperator (Goeldi, 1907)	Non-threatened	LC	187570	6	18	2002-2020	177655	171234	91.2909	-6420.74	3.61416	3,4,5,49	AMZ
Saguinus inustus (Schwarz, 1951)	Non-threatened	LC	260492	6	18	2002-2020	248231	247853	95.148	-378.234	0.152372	3,4,5,49	AMZ
Saguinus labiatus (É. Geoffroy in Humboldt, 1812)	Non-threatened	LC	259955	6	18	2002-2020	232340	223093	85.82	-9246.88	3.97989	3,4,5,49	AMZ
Saguinus martinsi (Thomas, 1912)	Non-threatened	NT	33181.4	6	18	2002-2020	26401	26194.4	78.943	-206.607	0.782573	3,4,5,49	AMZ
Saguinus midas (Linnaeus, 1758)	Non-threatened	LC	596463	6	18	2002-2020	513831	511051	85.6803	-2780.25	0.541083	3,4,5,49	AMZ
Saguinus mystax (Spix, 1823)	Non-threatened	LC	484272	6	18	2002-2020	469319	467761	96.5906	-1557.47	0.331858	3,4,5,49	AMZ
Saguinus niger (É. Geoffroy, 1803)	Threatened	VU	360794	6	18	2002-2020	254527	217279	60.2224	-37247.8	14.6342	3,4,5,49	AMZ, CE
Saguinus ursulus (É. Geoffroy, 1803)	None of the conservation status	NE	280071	6	18	2002-2020	166488	142241	50.7875	-24247.1	14.5639	3,4,5,49	AMZ, CE
Saimiri boliviensis (I. Geoffroy & de Blainville, 1834)	Non-threatened	LC	463405	8	24	1996-2020	441516	421495	90.956	-20021	4.5346	3,4,5,49	AMZ
Saimiri cassiquiarensis (Lesson, 1840)	Non-threatened	LC	549969	8	24	1996-2020	480886	476488	86.6391	-4397.49	0.914457	3,4,5,49	AMZ
Saimiri collinsi Osgood, 1916	Non-threatened	LC	896611	8	24	1996-2020	691373	570567	63.636	-120806	17.4734	3,4,5,49	AMZ, CE
Saimiri macrodon Elliot ,1907	Non-threatened	LC	386018	8	24	1996-2020	372396	370235	95.9114	-2160.33	0.580118	3,4,5,49	AMZ
Saimiri sciureus (Linnaeus, 1758)	Non-threatened	LC	595174	8	24	1996-2020	520496	515863	86.6743	-4632.82	0.890078	3,4,5,49	AMZ
Saimiri ustus I. Geoffroy,1843	Non-threatened	NT	1446090	8	24	1996-2020	1.20055e+06	1.05809e+06	73.1691	-142464	11.8665	3,4,5,49	AMZ, CE
Saimiri vanzolinii (Ayres, 1985)	Threatened	VU	1537.47	8	24	1996-2020	1132.21	1096.43	71.3137	-35.7852	3.16065	3,4,5,49	AMZ
Sapajus apella (Linnaeus, 1758)	Non-threatened	LC	4148090	11.6667	35	1985-2020	3.70798e+06	3.29633e+06	79.4662	-411649	11.1017	3,4,5,49	AMZ, CE
Sapajus cay (Illiger, 1815)	Threatened	VU	812926	11.6667	35	1985-2020	433407	295228	36.3168	-138179	31.8819	3,4,5,49	AMZ, CE, AF, PAN
Sapajus flavius (Schreber, 1774)	Threatened	EN	30981.1	11.6667	35	1985-2020	7269.05	6572.8	21.2155	-696.248	9.57826	3,4,5,49	AF, CA
Sapajus libidinosus (Spix, 1823)	Non-threatened	NT	1793430	11.6667	35	1985-2020	1.08784e+06	927784	51.7324	-160054	14.7131	3,4,5,49	AF, AMZ, CA, CE
Sapajus nigritus (Goldfuss, 1809)	Non-threatened	NT	824404	11.6667	35	1985-2020	229194	222194	26.952	-7000.3	3.05431	3,4,5,49	AF, CE, PAM
Sapajus robustus (Kuhl, 1820)	Threatened	EN	120436	11.6667	35	1985-2020	41852.9	38933.4	32.327	-2919.55	6.97574	3,4,5,49	AF, CE
Sapajus xanthosternos (Wied-Neuwied, 1826)	Threatened	EN	433664	11.6667	35	1985-2020	223874	198368	45.7423	-25505.8	11.3929	3,4,5,49	AF, CA, CE
